# Supplementary material for: Noninvasive Breathomics for Developing Carbonyl Biomarkers in Esophageal Cancer
Source: Research Square preprint supplement (doi:10.21203/rs.3.rs-8170337/v1), 2025-12-09
Supplement: Supplementary file 1 [file 45b3c507ad33a5183ec91ba0.docx]

**Supplementary Information**


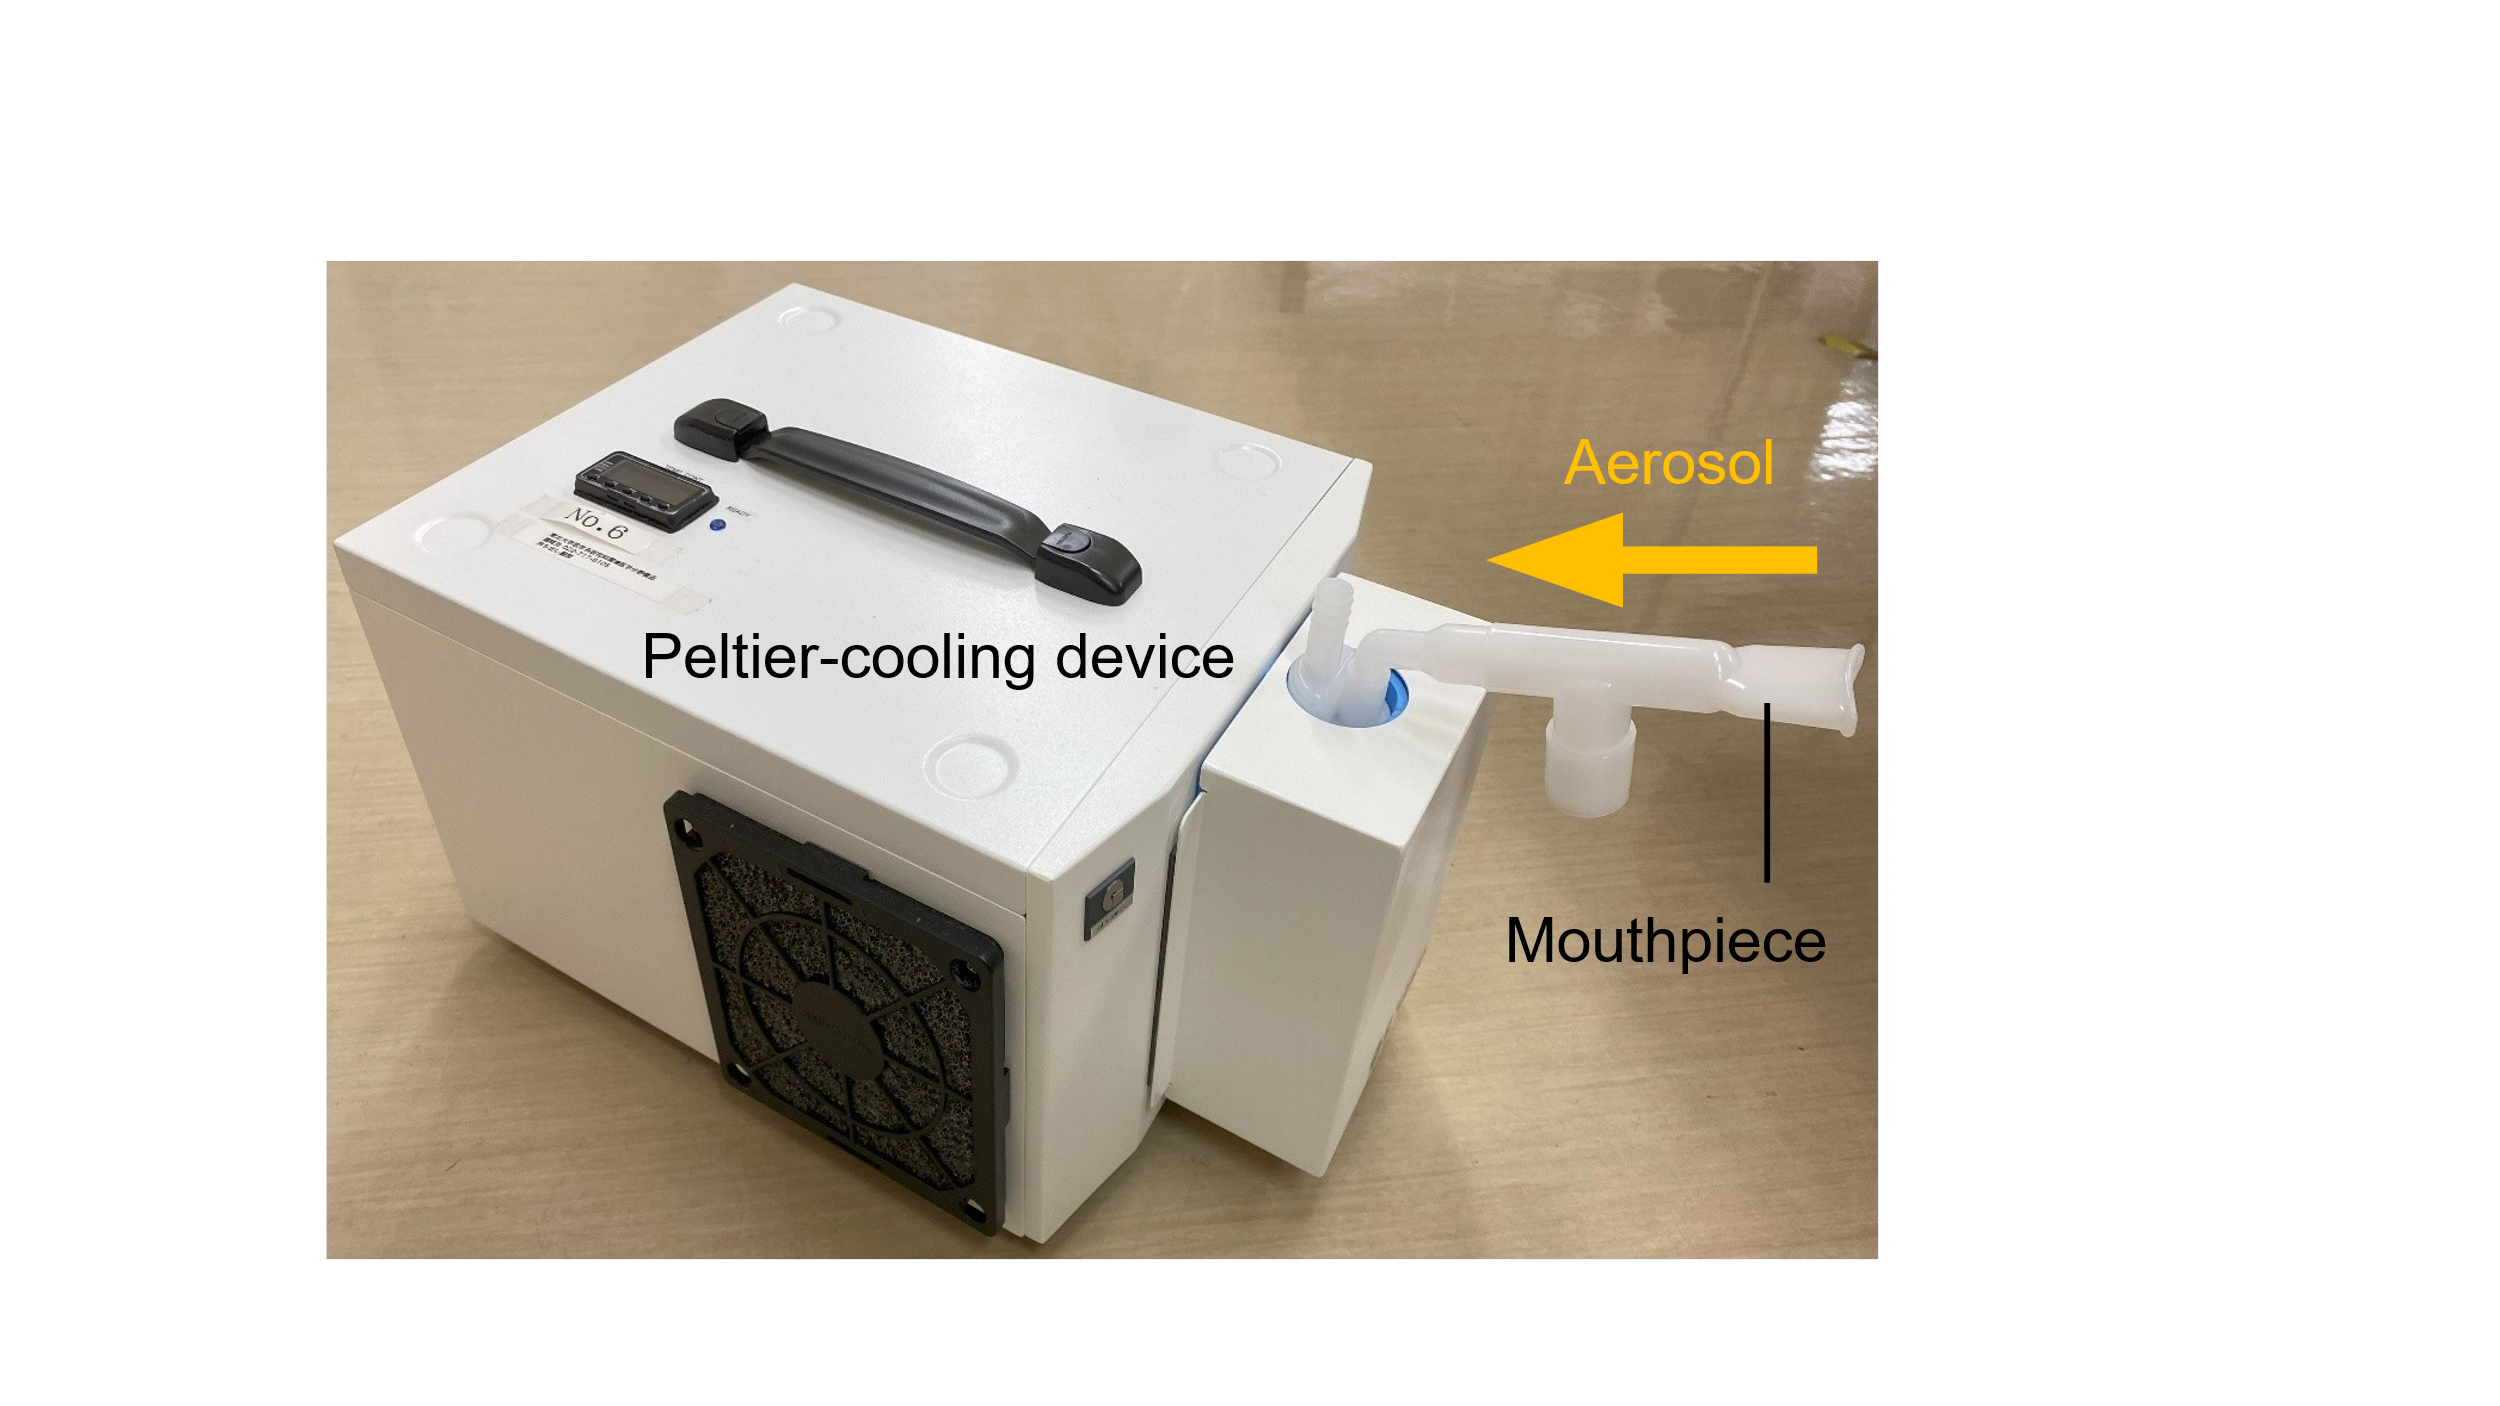


**Supplementary Fig. 1 Collection of EBC**

EBC was collected by applying a nose clip while the subject was seated and breathing normally at rest for 5 min. Using the Peltier-cooling device, the exhaled breath was rapidly cooled to −20 ℃.

Abbreviations: EBC, exhaled breath condensate


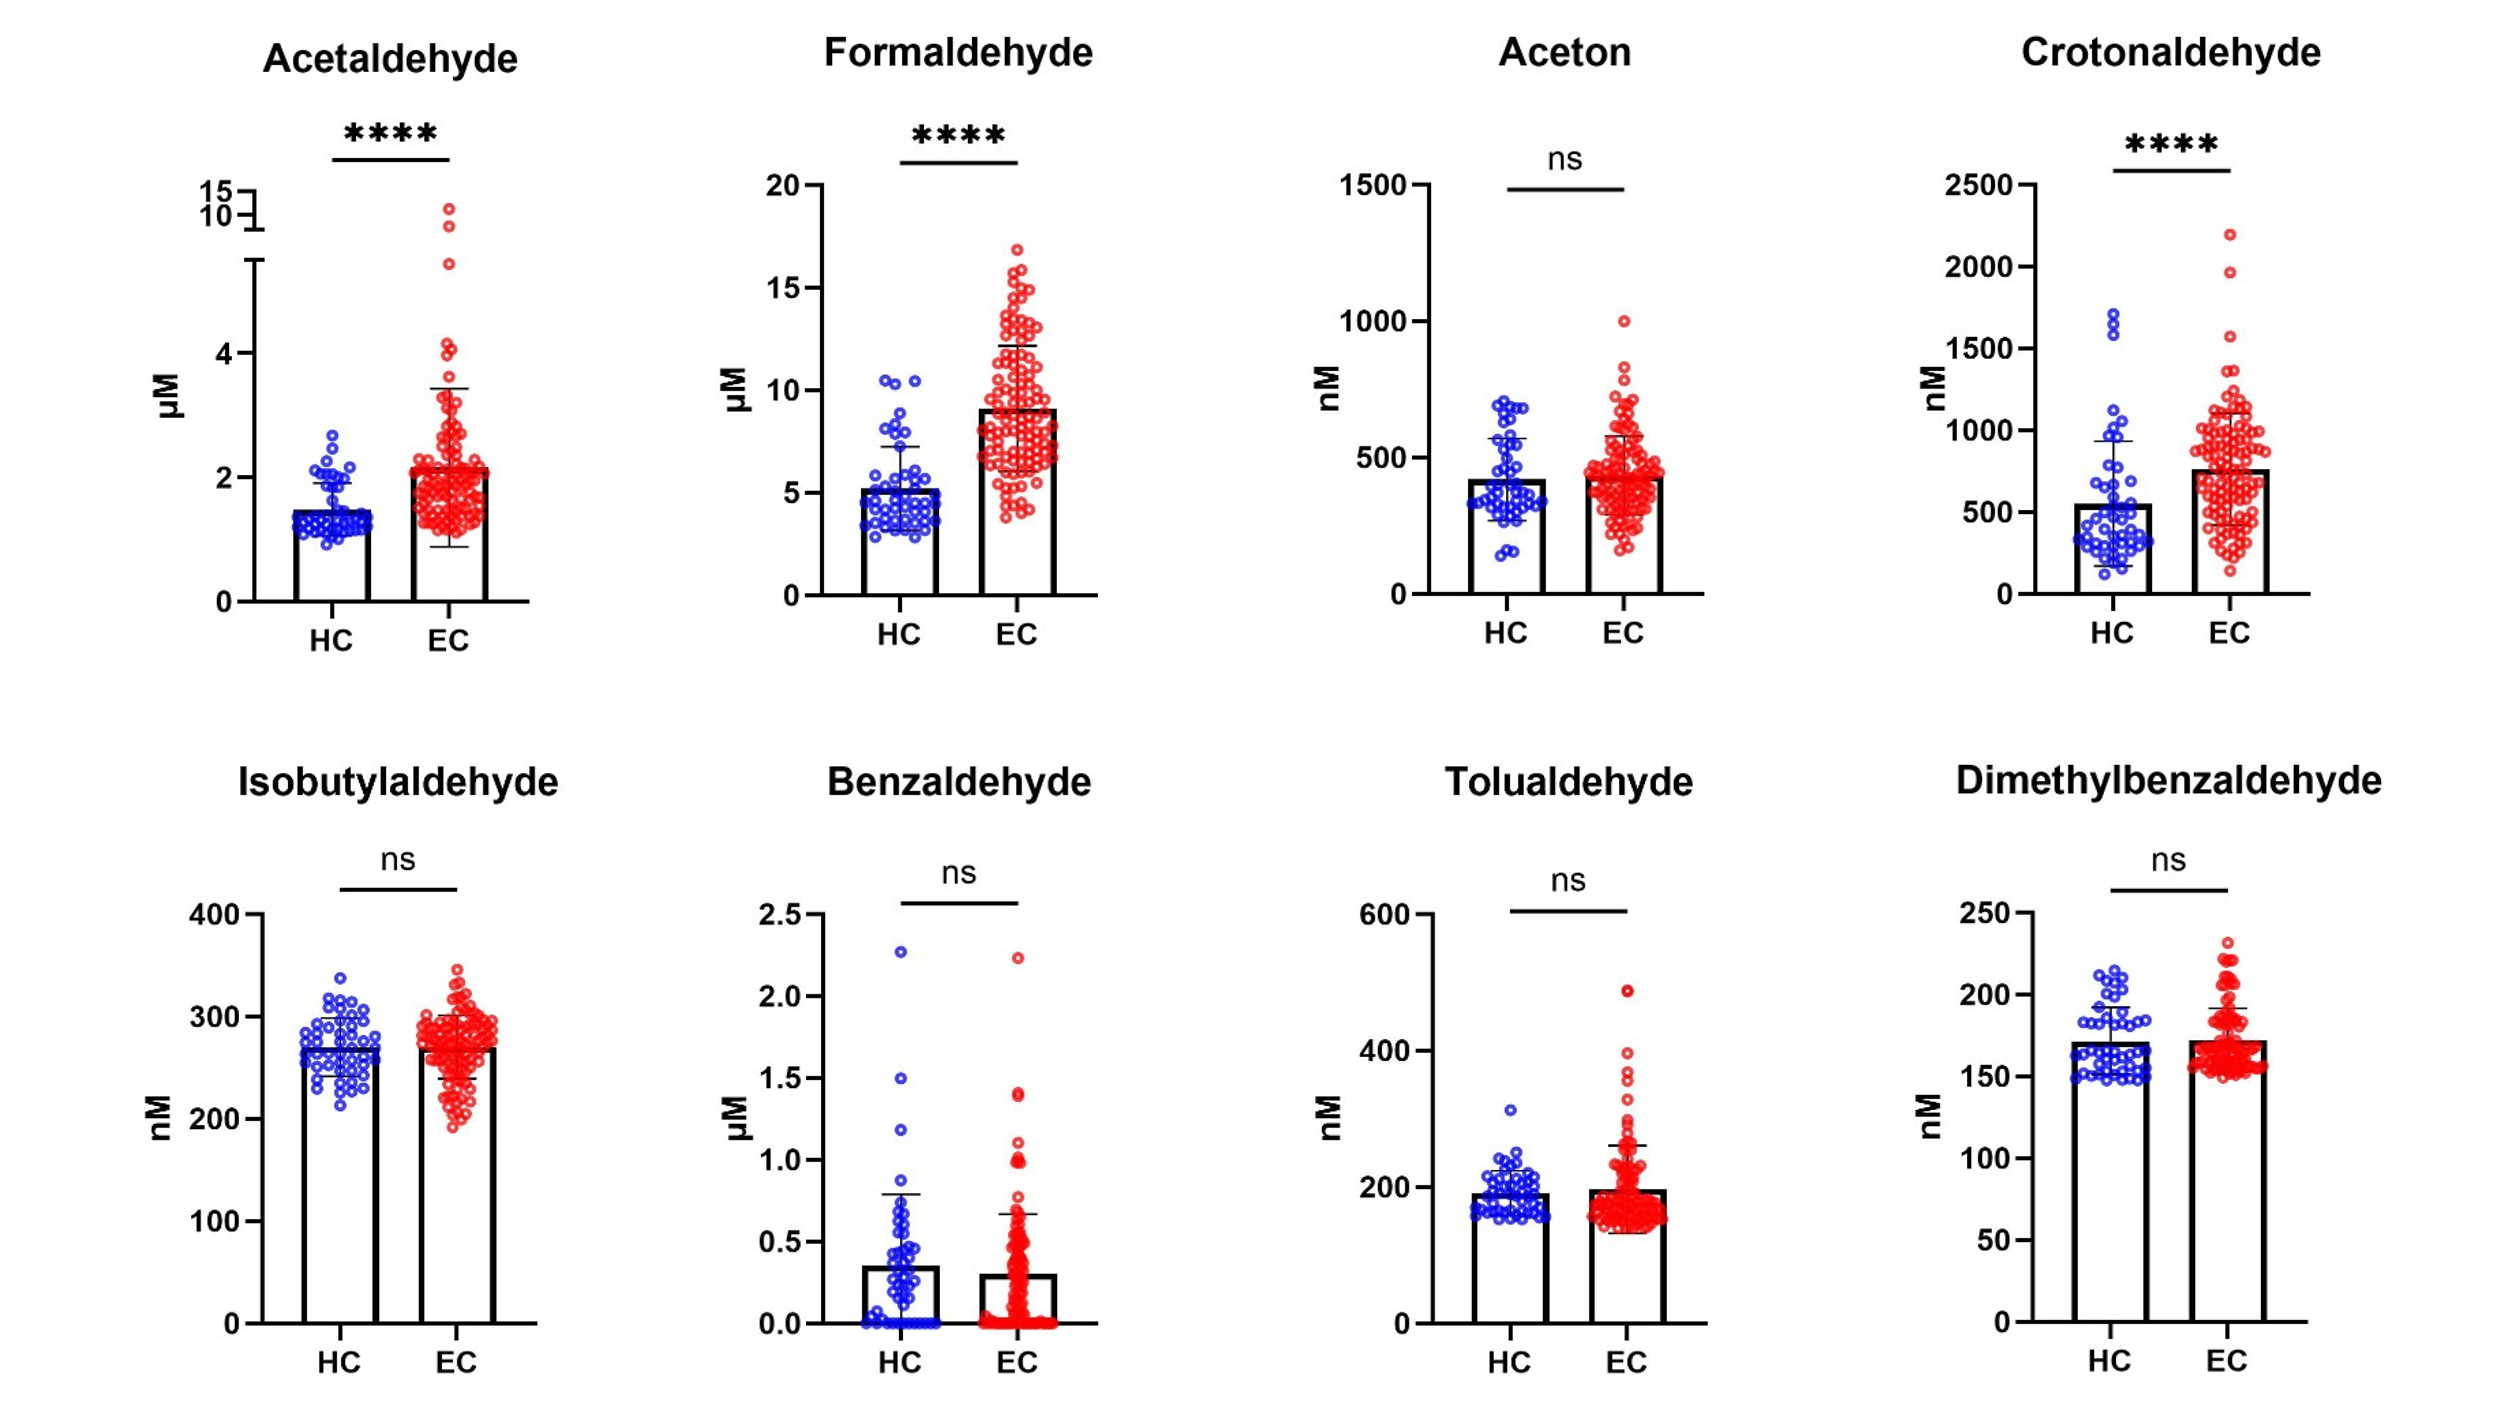


**Supplementary Fig. 2 Results of all aldehyde analyses**

All aldehydes in EBC could be quantitatively detected using LC-ESI-MS/MS. Each data point represents an individual patient with EC (n = 106) or an HC (n = 47). Data are presented as the mean ± standard deviation. **** *P* < 0.0001.

Abbreviations: EC, esophageal cancer; HC, healthy controls; LC-ESI-MS/MS, liquid chromatography–electrospray ionization–tandem mass spectrometry; Ns, not significant


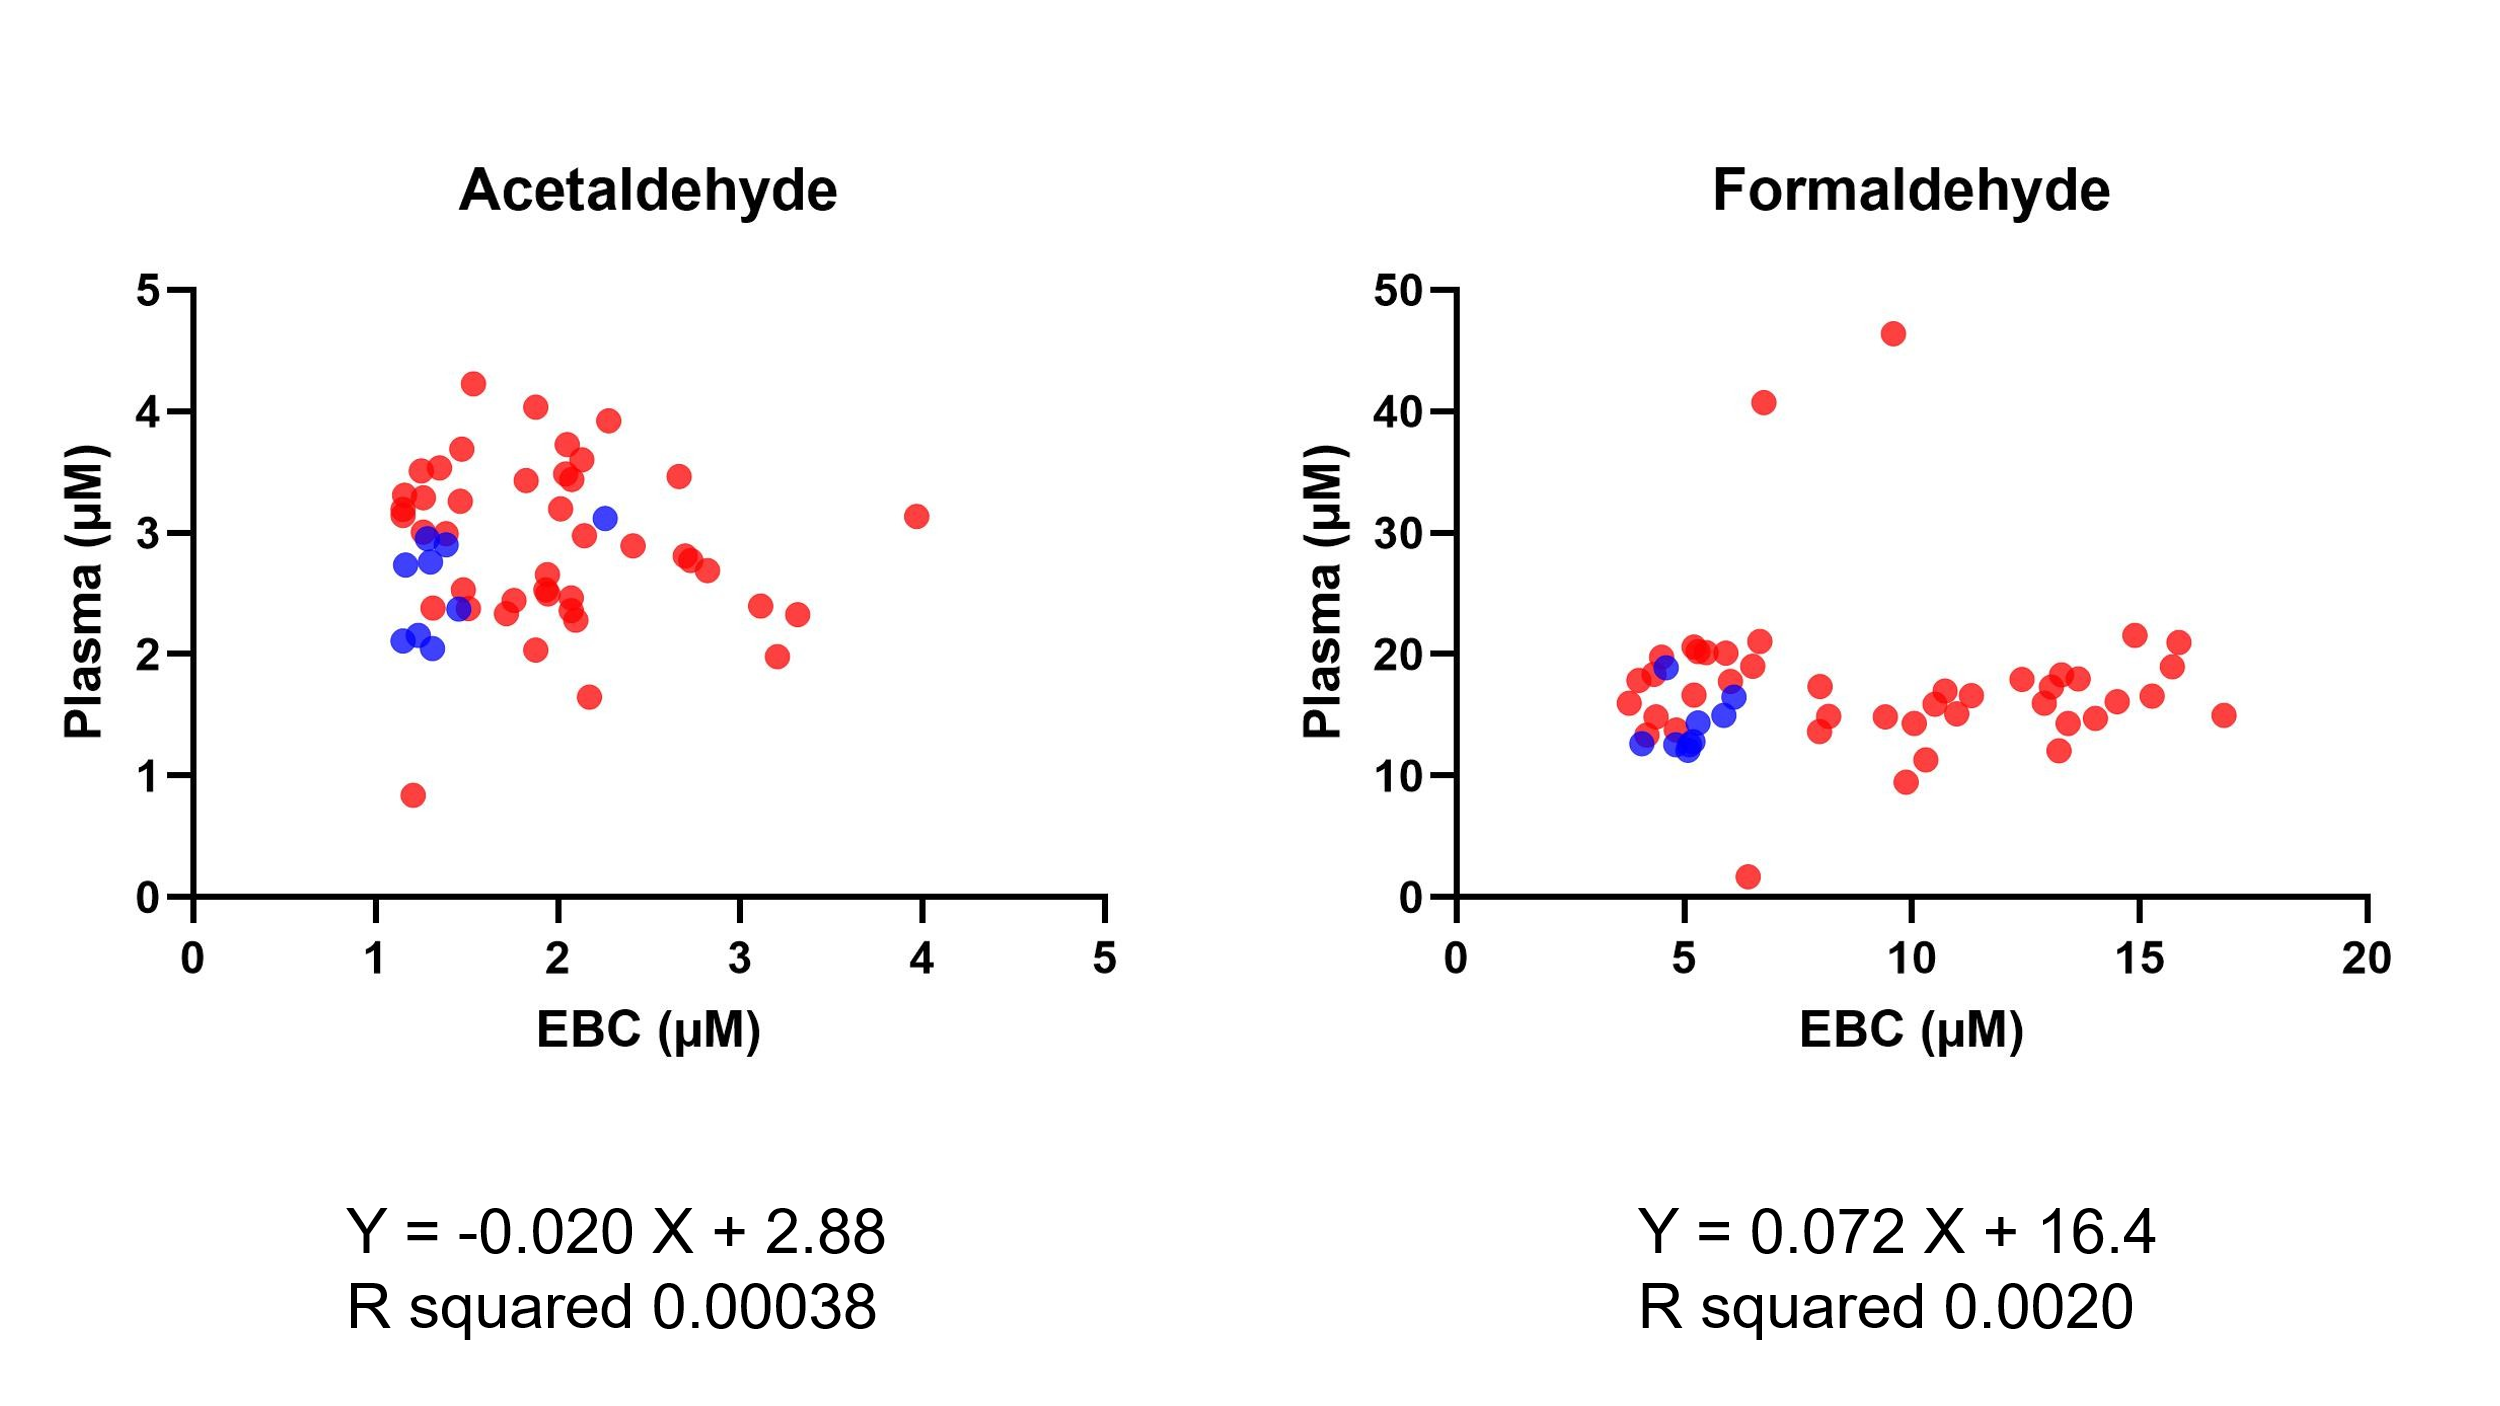


**Supplementary Fig. 3 Correlation between acetaldehyde and formaldehyde concentrations in both EBC and plasma**

Red and blue filled circles represent patients with EC and HC, respectively.

Abbreviations: EBC, exhaled breath condensate; EC, esophageal cancer; HC, healthy controls


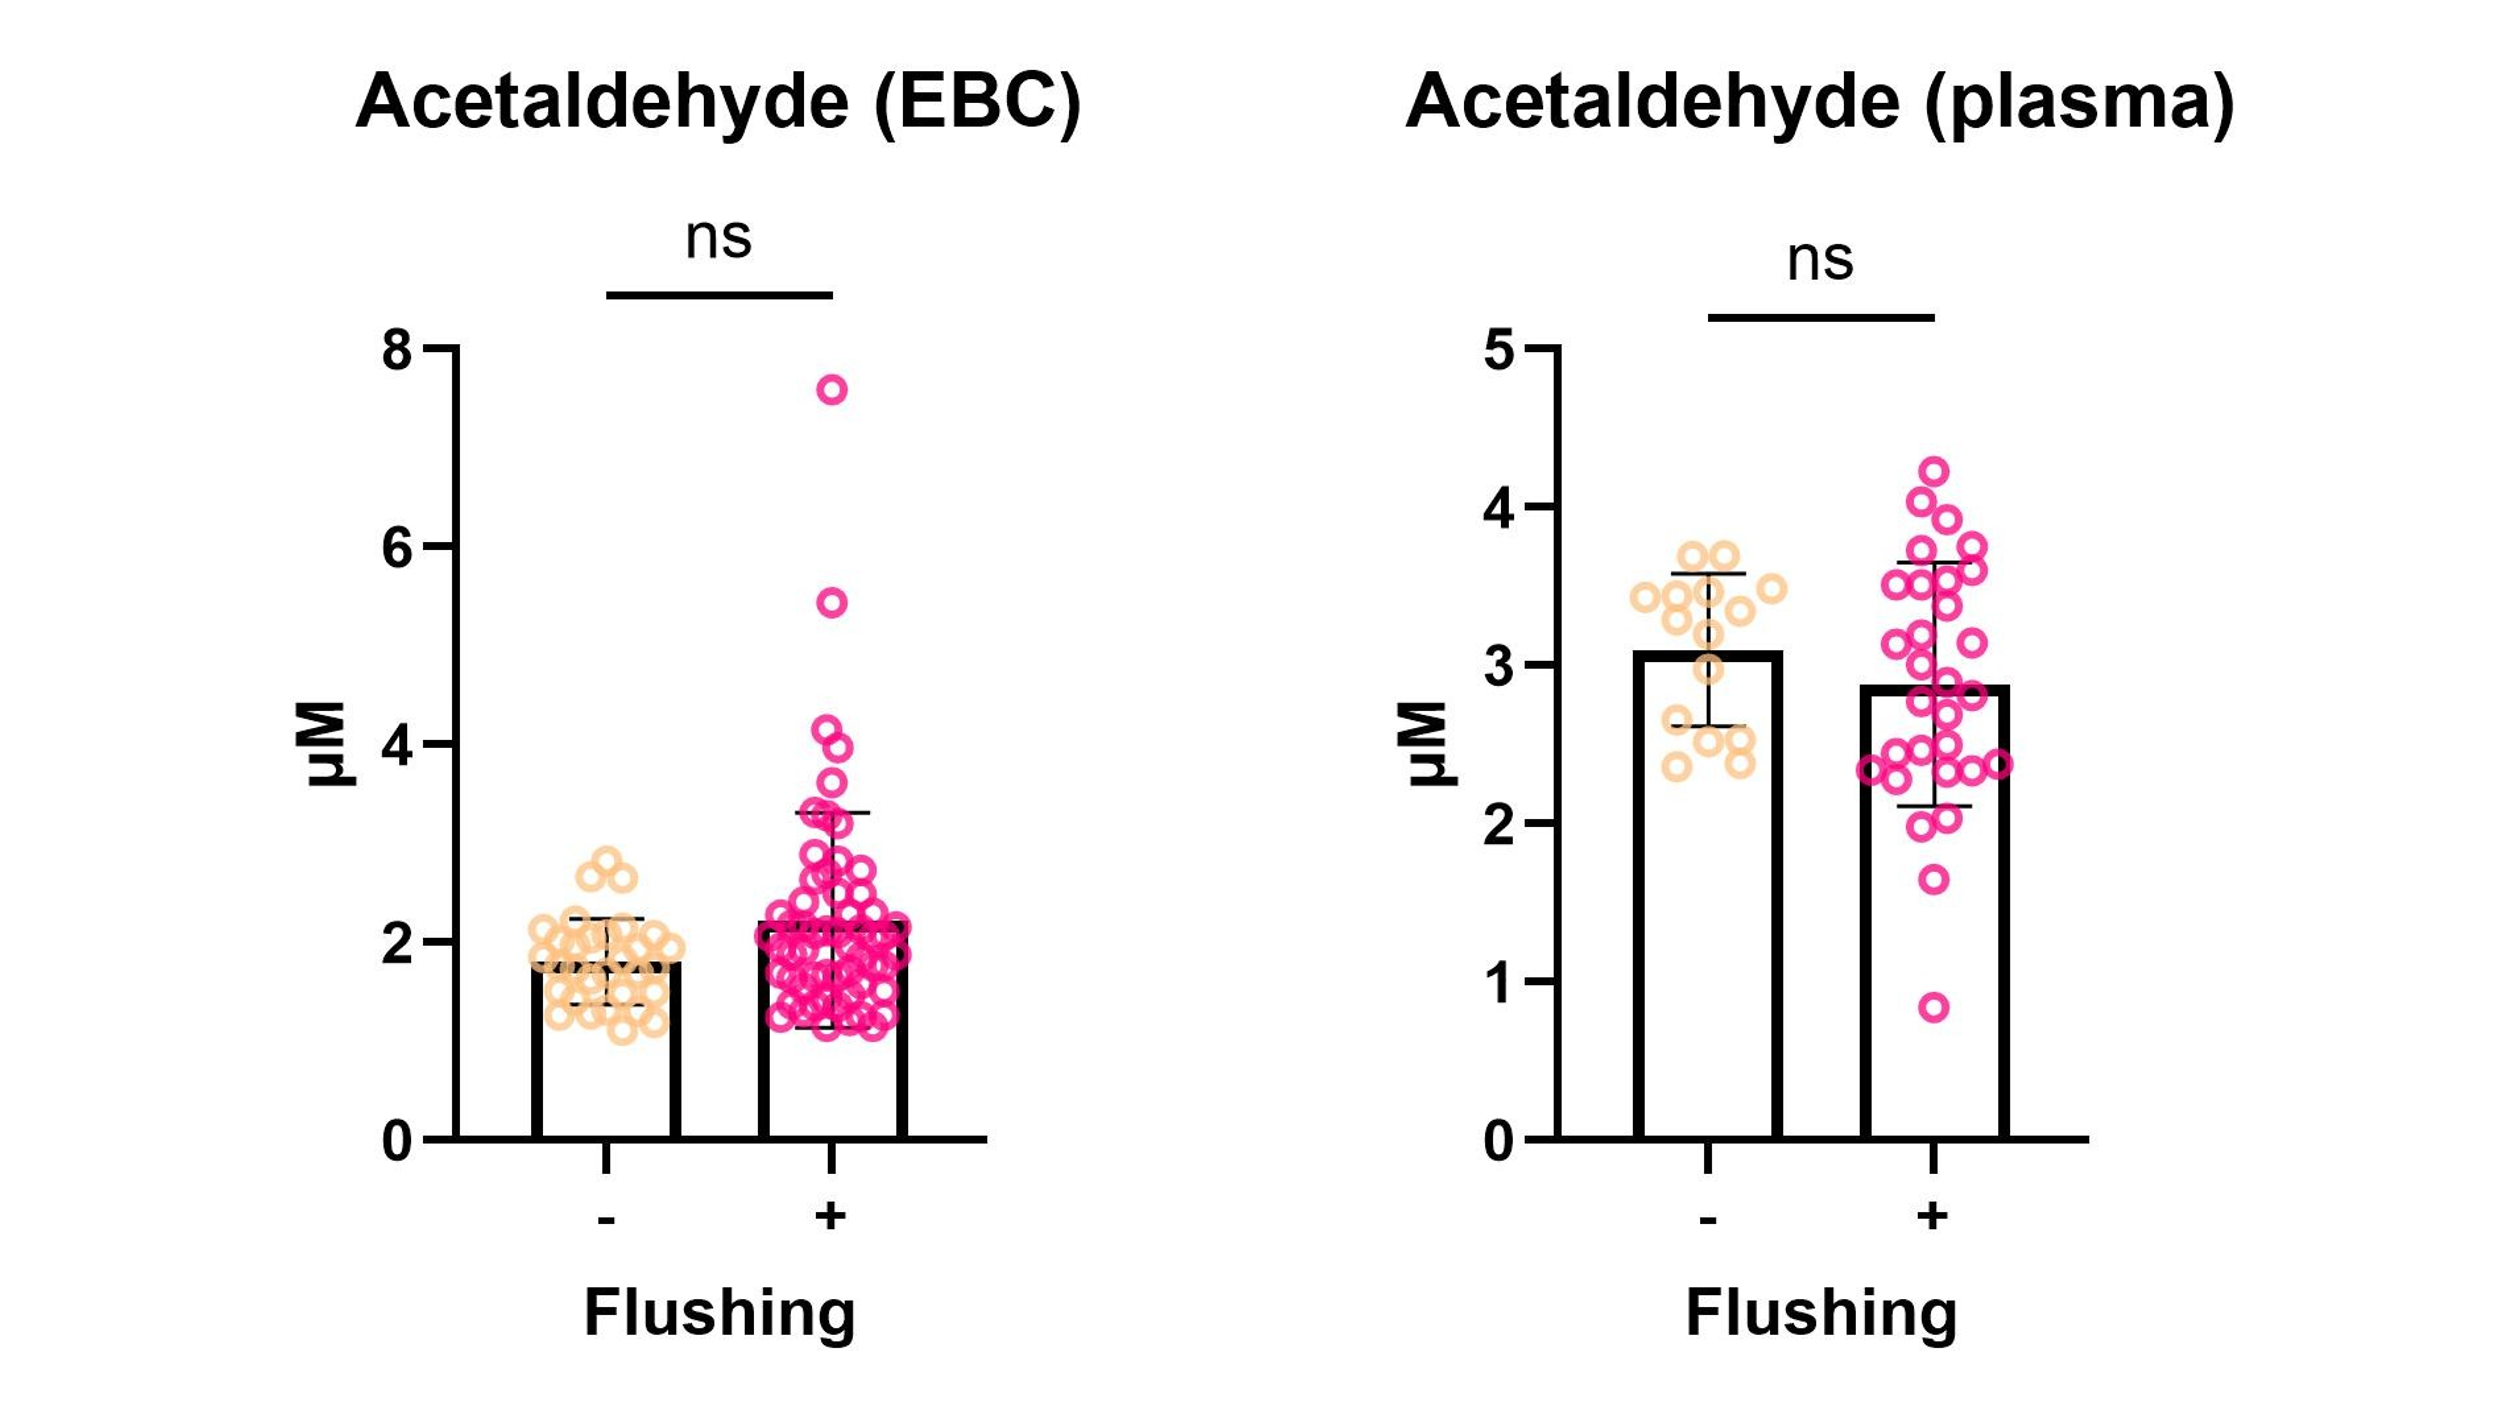


**Supplementary Fig. 4 Relationship between flushing and acetaldehyde concentration in both EBC and plasma**

Acetaldehyde concentration in the EBC was classified according to the presence or absence of flushing. Each data point represents an individual subject: the absence of flushing (n = 31) and the presence of flushing (n = 58) in the EBC; the absence of flushing (n = 15) and the presence of flushing (n = 30) in the plasma. Data are presented as the mean ± standard deviation.
Abbreviations: EBC, exhaled breath condensate; EC, esophageal cancer; HC, healthy controls; Ns, not significant

Supplementary Table 1. Multiple reaction monitoring parameters of various carbonyl compounds used for LC-ESI-MS/MS

| Analyte | Polarity | Precursor ion (m/z) | Product ion (m/z) | Collision energy (V) |
| --- | --- | --- | --- | --- |
| Formaldehyde-DNPH | − | 209.10 | 46.00 | 24 |
| Acetaldehyde-DNPH | − | 223.10 | 46.00 | 23 |
| Acrolein-DNPH | − | 235.10 | 199.95 | 14 |
| Valeraldehyde-DNPH | − | 265.20 | 96.95 | 25 |
| Acetone-DNPH | − | 237.10 | 191.05 | 10 |
| Crotonaldehyde-DNPH | − | 249.20 | 203.00 | 10 |
| Isobutylaldehyde-DNPH | − | 251.10 | 205.05 | 11 |
| Benzaldedehy-DNPH | − | 285.20 | 240.90 | 10 |
| o,m,p-Tolualdehyde-DNPH | − | 299.20 | 162.95 | 15 |
| Dimethylbenzaldehyde-DNPH | − | 313.30 | 267.05 | 15 |

Abbreviations: LC-ESI-MS/MS, liquid chromatography–electrospray ionization-tandem mass spectrometry; DNPH, 2,4-dinitrophenylhydrazine.
